# Supplementary material for: Robust VS4@rGO nanocomposite as a high-capacity and long-life cathode material for aqueous zinc-ion batteries
Source: Royal Society of Chemistry journal article supplement (doi:10.1039/d1nr02158c), 2021-01-01
Supplement: d1nr02158c1.pdf [file d1nr02158c1.pdf]

## Supporting Information

### Robust $\text{VS}_4@\text{rGO}$ Nanocomposite as a High-Capacity and Long-Life Cathode Material for Aqueous Zinc-Ion Batteries

Kaijian Chen, Xing Li\*, Jinhao Zang, Zhuangfei Zhang, Ye Wang, Qing Lou, Yucheng Bai, Jiatian Fu, Chenfei Zhuang, Ying Zhang, Leilei Zhang, Shuge Dai\*, Chongxin Shan\*

*Henan Key Laboratory of Diamond Optoelectronic Materials and Devices, Key Laboratory of Material Physics, Ministry of Education, School of Physics and Microelectronics, Zhengzhou University, Zhengzhou, 450052, China*

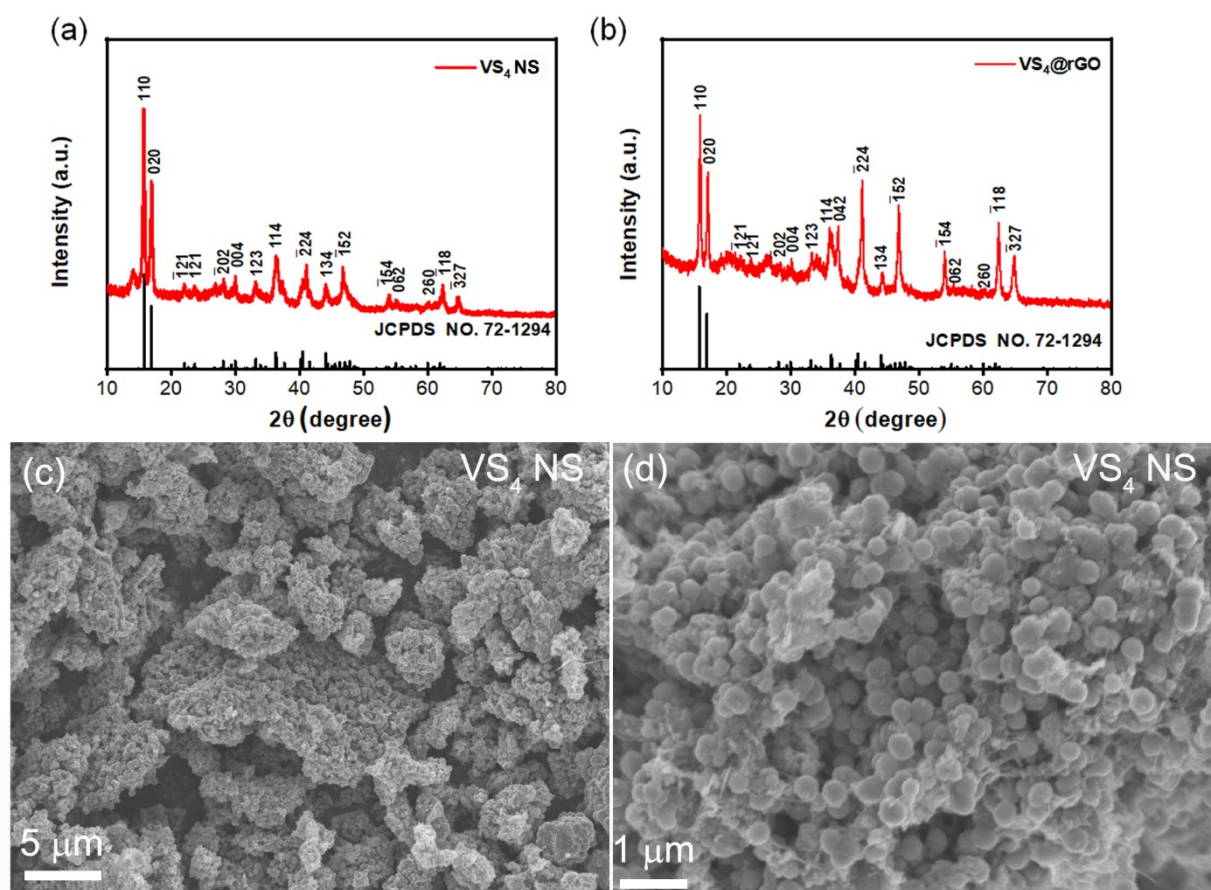

**Fig. S1** XRD pattern of the (a)  $\text{VS}_4\text{NS}$  and (b)  $\text{VS}_4@\text{rGO}$  sample. (c-d) Low-mag SEM images of  $\text{VS}_4\text{NS}$  sample.

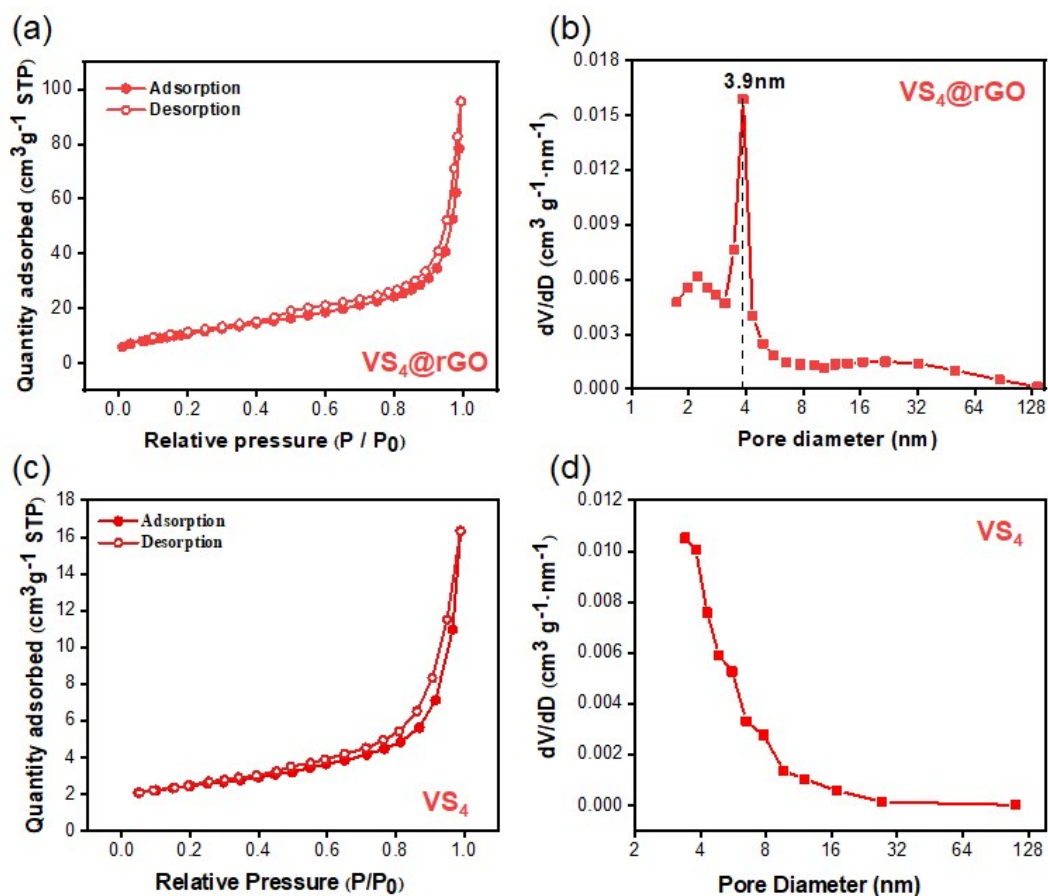

**Fig. S2** (a) Nitrogen adsorption-desorption isotherm and (b) pore size distribution of the  $VS_4@rGO$  composite. (c) Nitrogen adsorption-desorption isotherm and (d) pore size distribution of the  $VS_4$  NS sample.

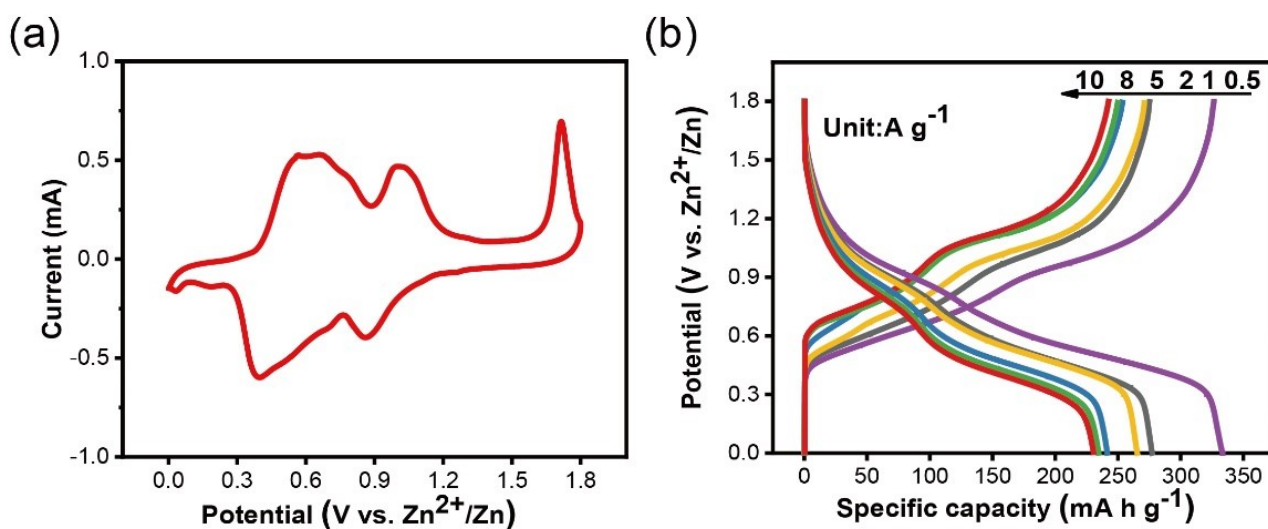

**Fig. S3** Electrochemical performance of  $VS_4$  NS. (a) CV curve at the scan rate of  $0.5 \text{ mV s}^{-1}$ . (b) GDC curves at different current densities.

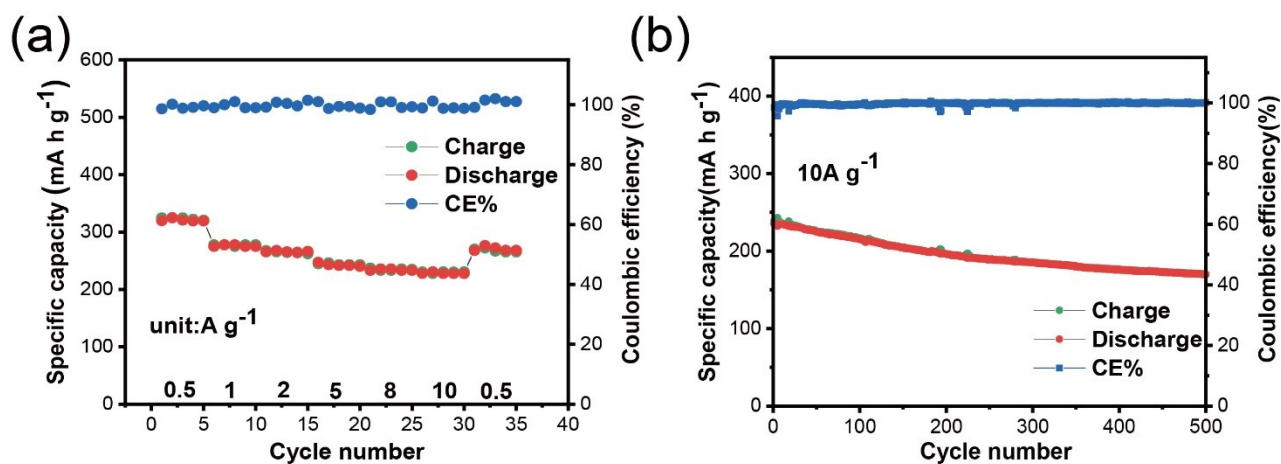

**Fig. S4** (a) Rate performance of the VS<sub>4</sub> NS electrode at current densities of 0.5, 1, 2, 5, 8 and 10 A g<sup>-1</sup>. (c) Cycle performance at the current density of 10 A g<sup>-1</sup>.

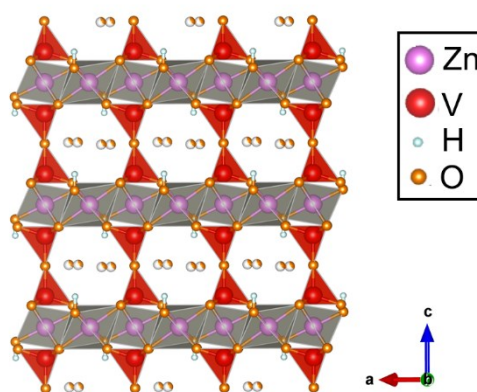

**Fig. S5** Schematic illustration of the crystal structure of Zn<sub>3</sub>(OH)<sub>2</sub>V<sub>2</sub>O<sub>7</sub>·2H<sub>2</sub>O viewed along (010) direction.

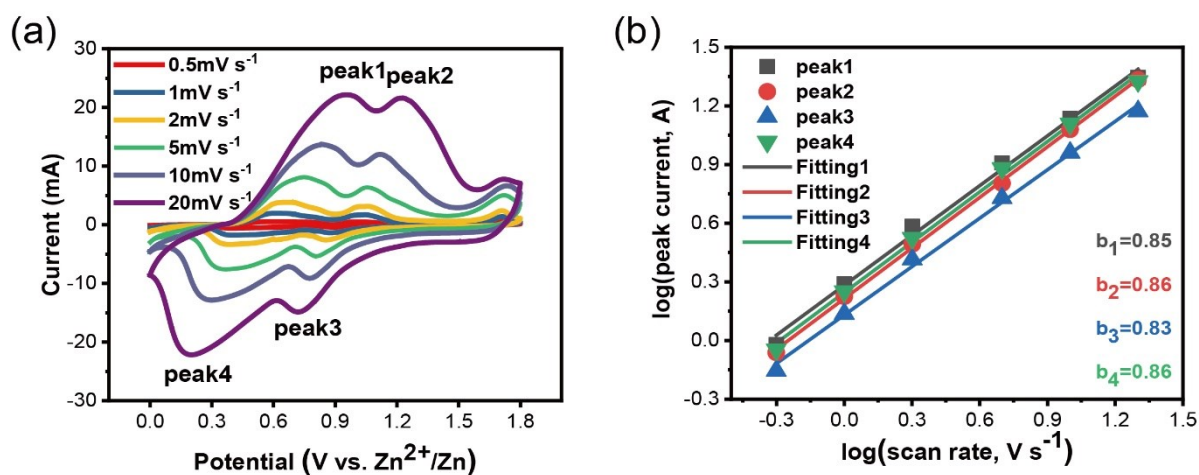

**Fig. S6** (a) CV curves of the VS<sub>4</sub>@rGO composite electrode at scan rates of 0.5, 1, 2, 5, 10 and 20 mV s<sup>-1</sup>. (b) log(i) versus log(v) plots at different redox peaks of the composite electrode.

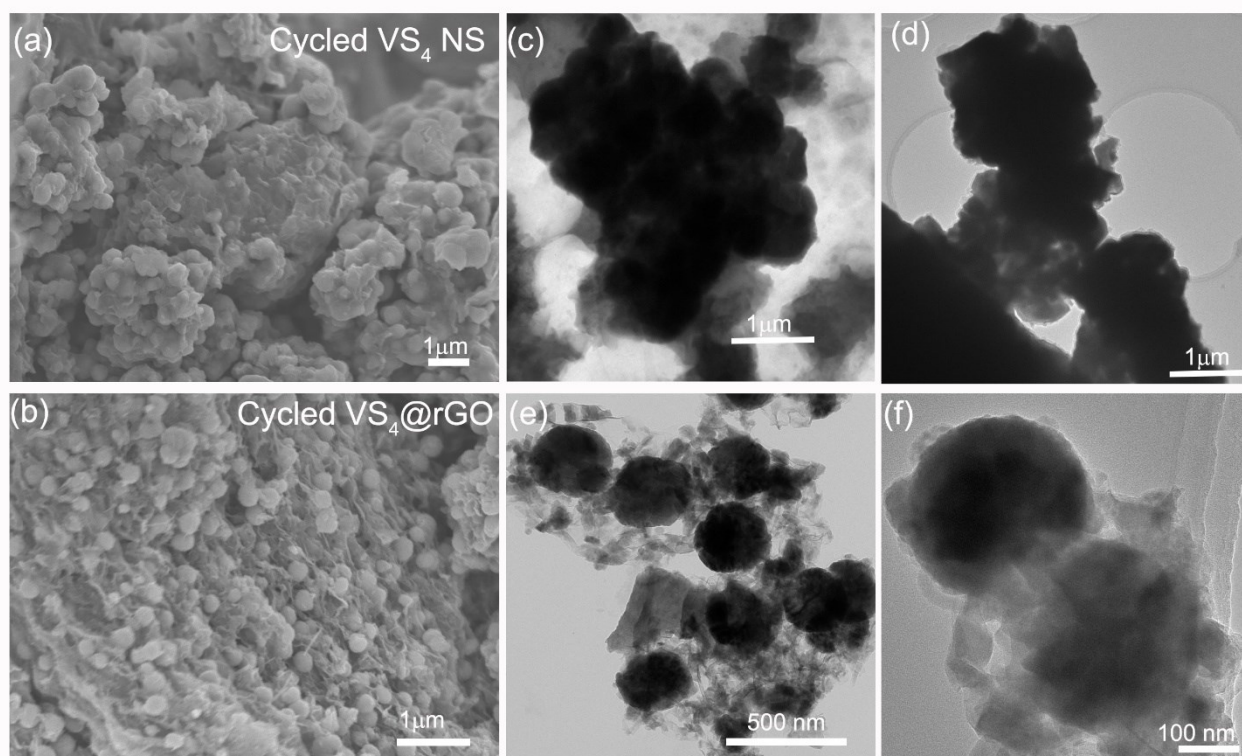

Fig. S7 (a) SEM and (c-d) TEM images of the  $\text{VS}_4$  NS electrode after 1000 cycles at  $10\text{A g}^{-1}$ . (b) SEM and (e-f) TEM images of the  $\text{VS}_4@\text{rGO}$  electrode after 1000 cycles at  $10\text{A g}^{-1}$ .

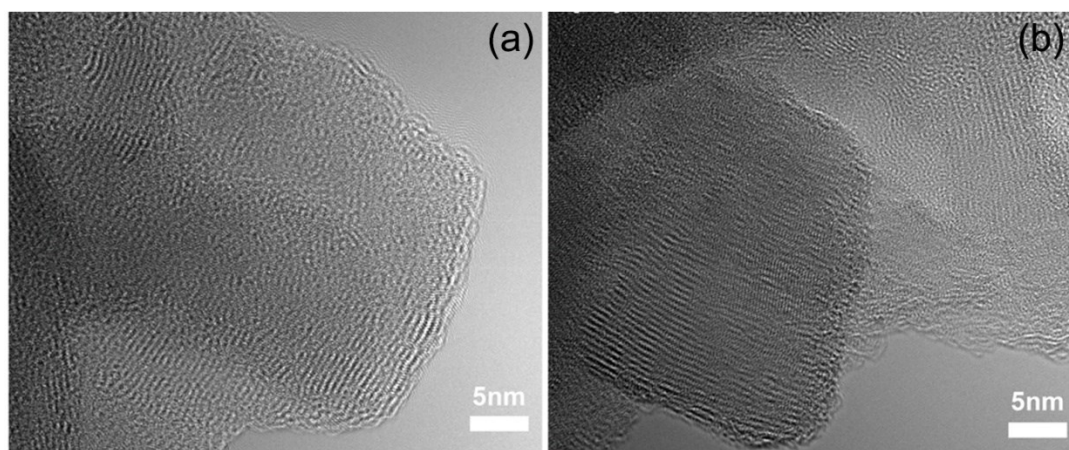

Fig. S8 HRTEM images of the cycled  $\text{VS}_4@\text{r-GO}$ .

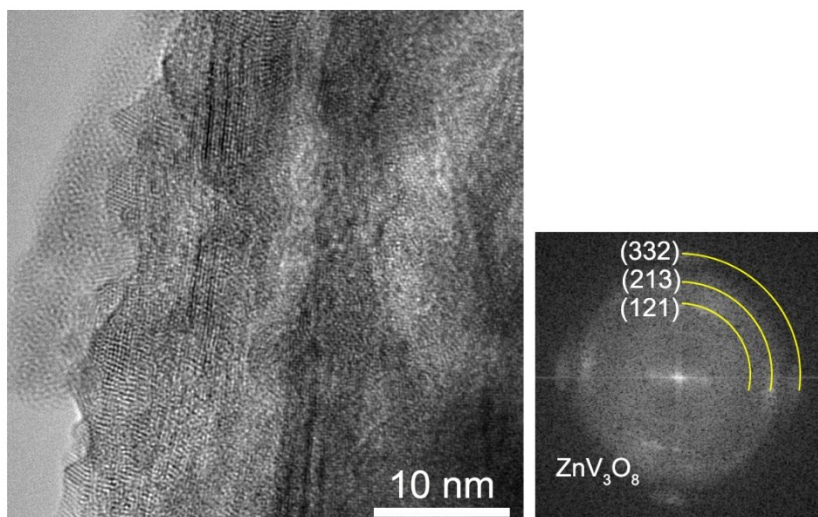

**Fig. S9** HRTEM image of the cycled  $VS_4@rGO$ .

**Table S1.** Fitting results of the  $R_s$  and  $R_{ct}$  values in Nyquist curves (Fig. 3e)

| Cycle Number          | OCV ( $VS_4@rGO$ ) | 50 ( $VS_4@rGO$ ) | OCV ( $VS_4NS$ ) |
|-----------------------|--------------------|-------------------|------------------|
| $R_s$ ( $\Omega$ )    | 5.53               | 5.75              | 6.39             |
| $R_{ct}$ ( $\Omega$ ) | 39.74              | 20.30             | 76.10            |

**Table S2** Comparison of operational voltage and discharge capacity of various cathode materials in aqueous Zn-ion batteries

| Cathode material                  | Testing voltage (V) | Main operating voltage (V) | Discharge Capacity (mA h g <sup>-1</sup> ) | Reference |
|-----------------------------------|---------------------|----------------------------|--------------------------------------------|-----------|
| $VS_4@rGO$                        | 0-1.8               | 0.89, 0.43                 | 450@0.5A g <sup>-1</sup>                   | Our work  |
| $VS_4@rGO$                        | 0.35-1.8            | 0.89, 0.54                 | 225@0.5A g <sup>-1</sup>                   | 1         |
| $VS_4$                            | 0.2-1.6             | 0.89, 0.53                 | 260@0.25A g <sup>-1</sup>                  | 2         |
| $VS_2$                            | 0.4-1.0             | 0.68, 0.6                  | 178@0.1A g <sup>-1</sup>                   | 3         |
| rGO- $VS_2$                       | 0.2-1.8             | 0.92, 0.61                 | 174@0.5A g <sup>-1</sup>                   | 4         |
| $VS_2@VOOH$                       | 0.4-1.0             | 0.68, 0.59                 | 142.8@0.5A g <sup>-1</sup>                 | 5         |
| $VS_2$                            | 0.4-1.0             | 0.69, 0.58                 | 168@0.5A g <sup>-1</sup>                   | 6         |
| $VS_2$                            | 0.4-1.0             | 0.75, 0.58                 | 136.8@0.5A g <sup>-1</sup>                 | 7         |
| p- $V_2O_5$                       | 0.3-1.5             | 0.91, 0.54                 | 242@0.5 A g <sup>-1</sup>                  | 8         |
| $V_2O_3/C$                        | 0.3-1.5             | 0.92, 0.56                 | 272.4@0.5 A g <sup>-1</sup>                | 9         |
| $Zn_3V_2O_7(OH)_2 \cdot 2H_2O$    | 0.2-1.8             | 0.85, 0.58                 | 122@0.5 A g <sup>-1</sup>                  | 10        |
| $Na_2V_6O_{16} \cdot 2.14H_2O$    | 0.2-1.6             | 0.73, 0.45                 | 346@0.5 A g <sup>-1</sup>                  | 11        |
| $(NH_4)_2V_6O_{16} \cdot 1.5H_2O$ | 0.4-1.6             | 0.70, 0.49                 | 307@0.5 A g <sup>-1</sup>                  | 12        |

**References :**

- 1 H. Qin, Z. Yang, L. Chen, X. Chen and L. Wang, *J. Mater. Chem. A*, 2018, **6**, 23757-23765.
- 2 Q. Zhu, Q. Xiao, B. Zhang, Z. Yan, X. Liu, S. Chen, Z. Ren and Y. Yu, *J. Mater. Chem. A*, 2020, **8**, 10761-10766.
- 3 J. Zhu, T. Jian, Y. Wu, W. Ma, Y. Lu, L. Sun, F. Meng, B. Wang, F. Cai and J. Gao, *Appl. Surf. Sci.*, 2021, **544**, 148882.
- 4 T. Chen, X. Zhu, X. Chen, Q. Zhang, Y. Li, W. Peng, F. Zhang and X. Fan, *J. Power Sources*,

2020, **477**, 228652.

- 5 X. Pu, T. Song, L. Tang, Y. Tao, T. Cao, Q. Xu, H. Liu, Y. Wang and Y. Xia, *J. Power Sources*, 2019, **437**, 226917.
- 6 T. Jiao, Q. Yang, S. Wu, Z. Wang, D. Chen, D. Shen, B. Liu, J. Cheng, H. Li and L. Ma, *J. Mater. Chem. A*, 2019, **7**, 16330-16338.
- 7 P. He, M. Yan, G. Zhang, R. Sun, L. Chen, Q. An and L. Mai, *Adv. Energy Mater.* 2017, **7**, 1601920.
- 8 Y. Ding, Y. Peng, W. Chen, Y. Niu, S. Wu, X. Zhang and L. Hu, *Appl. Surf. Sci.*, 2019, **493**, 368-374.
- 9 Y. Ding, Y. Peng, S. Chen, X. Zhang, Z. Li, L. Zhu, L. E. Mo and L. Hu, *ACS Appl. Mater. Interfaces*, 2019, **11**, 44109-44117.
- 10 C. Xia, J. Guo, Y. Lei, H. Liang, C. Zhao and H. N. Alshareef, *Adv. Mater.*, 2018, **30**, 1705580.
- 11 F. Hu, D. Xie, D. Zhao, G. Song and K. Zhu, *J. Energy Chem.*, 2019, **38**, 185-191.
- 12 S. Chen, Y. Zhang, H. Geng, Y. Yang, X. Rui and C. Li, *J. Power Sources*, 2019, **441**, 227192.
